# Supplementary material for: Immuno-Sensing at Ultra-Low Concentration of TG2 Protein by Organic Electrochemical Transistors
Source: MDPI journal article supplement (doi:10.3390/bios13040448), 2023-03-31
Supplement: s1 [file s1]

Supplementary Materials

# Immuno-Sensing at Ultra-Low Concentration of TG2 Protein by Organic Electrochemical Transistors

Valentina Preziosi <sup>1,\*</sup>, Mario Barra <sup>2,\*</sup>, Valeria Rachela Villella <sup>1,3</sup>, Speranza Esposito <sup>1,3</sup>, Pasquale D'Angelo <sup>4</sup>, Simone Luigi Marasso <sup>4,5</sup>, Matteo Cocuzza <sup>4,5</sup>, Antonio Cassinese <sup>2,6</sup> and Stefano Guido <sup>1,3,7</sup>

a)

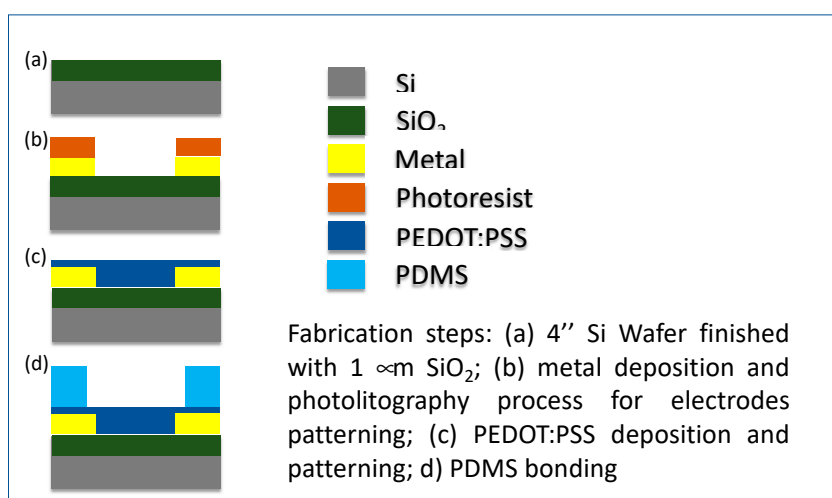

b)

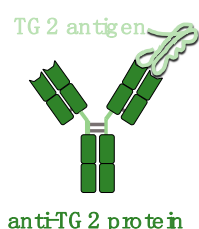

c)

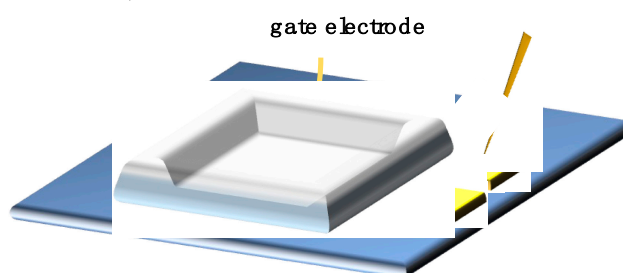

**Figure S1.** Experimental setup; (a) Fabrication steps; (b) anti-TG2 protein-antigen bound; (c) OEECT layout.

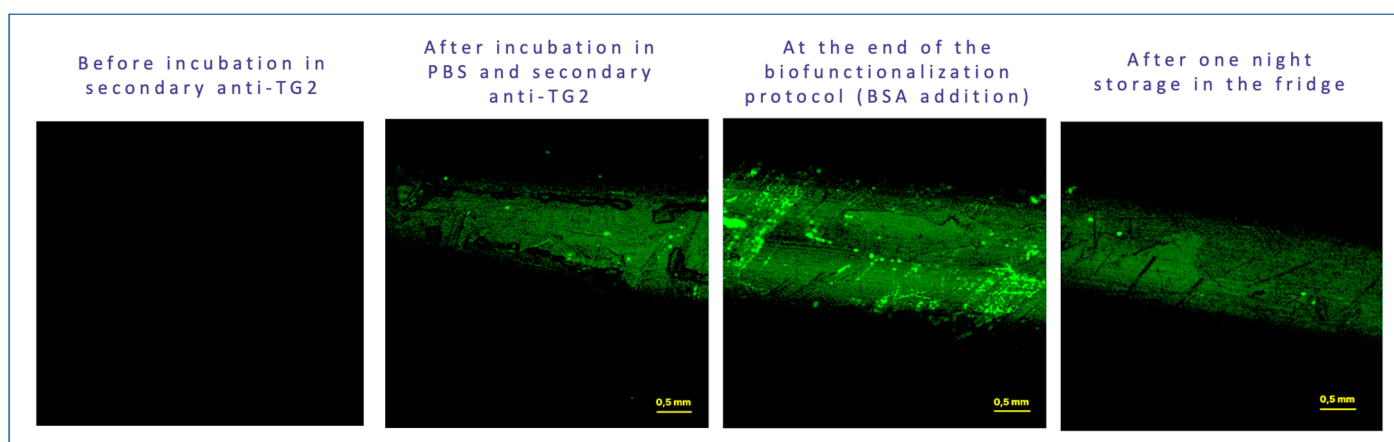

**Figure S2.** CLSM imaging of the gate electrode during functionalization process: from left to right: before incubation in secondary anti-TG2; after incubation in anti-TG2 PBS solution; at the end of functionalization process; after one night.

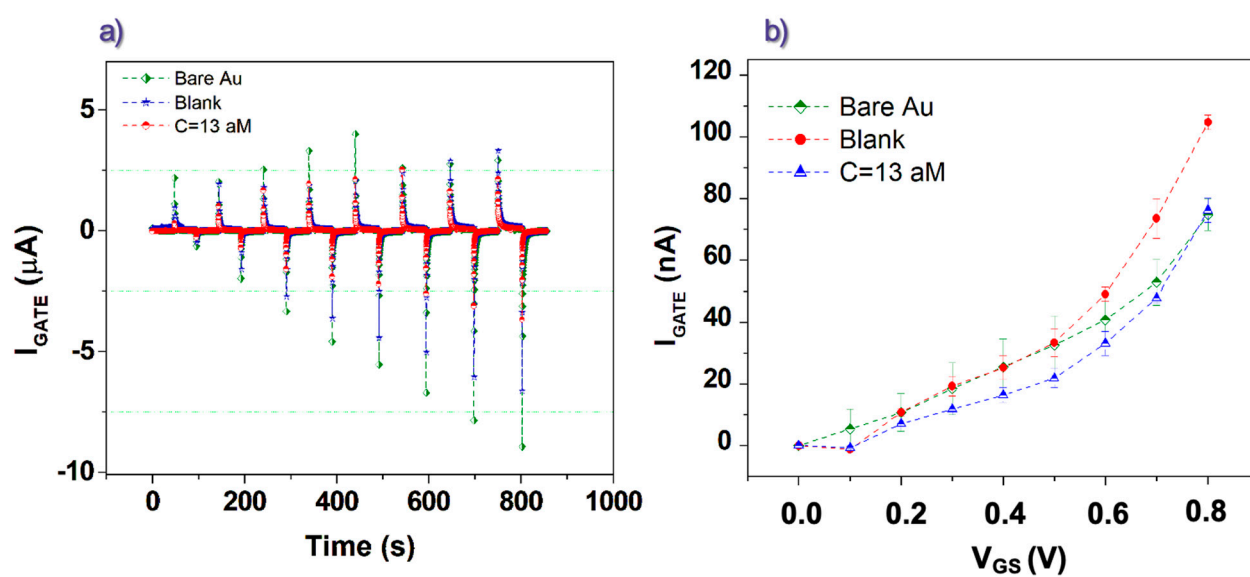

**Figure S3.** (a)  $I_{\text{GATE}}$  vs. time (pulse) curves corresponding to the  $I_{\text{DS}}$  measurements shown in Figure 2a of the main text. (b) Average  $I_{\text{GATE}}$  values as a function of  $V_{\text{GS}}$ . Error bars represent the standard deviations.

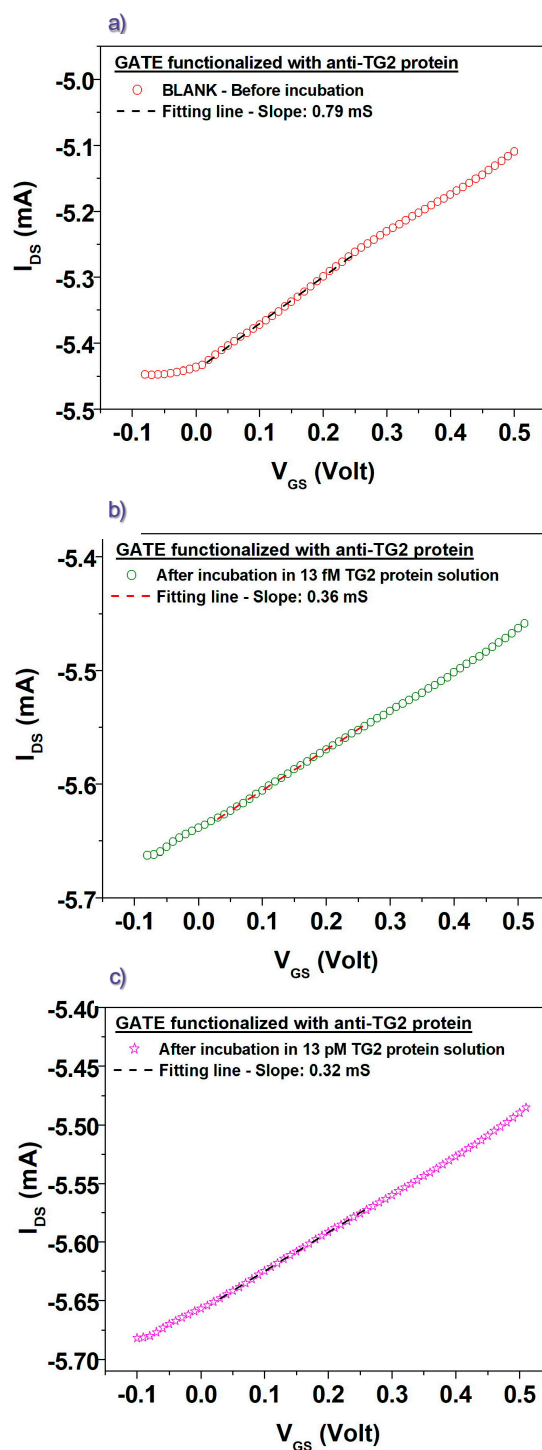

**Figure S4.** Linear fitting in the low  $V_{GS}$  region of transfer curves (at  $V_{DS} = -0.1$  V) obtained for a gate electrode functionalized with anti-TG2 antibody (a) before any incubation step (Blank), (b) after incubation in a TG2 protein solution with femtomolar concentration, (c) after incubation in a TG2 protein solution with picomolar concentration.
